# Supplementary material
Source: Springer Nature journal article supplement (https://www.springermedizin.de/resource/supplementary/12891_2013_2201_MOESM1_ESM.pdf/9509668)
Supplement: MOESM1 [file 9509668]

| No. | Telomeric KIR genes |      |      |      |       | Haplotype frequency |                 |                 |
|-----|---------------------|------|------|------|-------|---------------------|-----------------|-----------------|
|     | 3DL1                | 3DS1 | 2DS5 | 2DS1 | 2DS4f | 2DS4d               | Good-responders | Poor-responders |
| 1   | ■                   |      |      |      |       | ■                   | 58.68           | 52.62           |
| 2   | ■                   |      |      |      | ■     |                     | 14.63           | 18.44           |
| 3   |                     | ■    | ■    | ■    |       |                     | 9.53            | 13.4            |
| 4   |                     | ■    |      | ■    |       |                     | 6.38            | 5.21            |
| 5   | ■                   |      |      | ■    |       |                     | 2.02            | 3.01            |
| 6   |                     |      | ■    |      |       | ■                   | 1.52            | 0.82            |
| 7   | ■                   |      | ■    | ■    |       |                     | 1.21            | 0.78            |
| 8   | ■                   |      |      |      | ■     |                     | 0.94            | < 0.02          |
| 9   |                     | ■    |      |      |       | ■                   | 0.92            | < 0.02          |
| 10  | ■                   |      | ■    | ■    |       | ■                   | 0.86            | 1.1             |
| 11  |                     | ■    | ■    | ■    |       | ■                   | 0.82            | < 0.02          |
| 12  | ■                   |      | ■    |      |       |                     | 0.8             | < 0.02          |
| 13  | ■                   |      | ■    |      | ■     |                     | 0.61            | 1.15            |
| 14  |                     | ■    |      | ■    |       | ■                   | 0.4             | 1.66            |
| 15  |                     | ■    | ■    |      |       |                     | 0.3             | < 0.02          |
| 16  |                     | ■    | ■    | ■    | ■     |                     | 0.15            | 0.39            |
| 17  | ■                   |      |      | ■    |       | ■                   | 0.11            | 0.03            |
| 18  | ■                   |      |      |      |       |                     | 0.09            | 0.35            |
| 19  |                     | ■    | ■    |      |       | ■                   | 0.03            | < 0.02          |
| 20  |                     | ■    |      |      |       |                     | < 0.02          | 0.71            |
| 21  | ■                   |      | ■    | ■    | ■     |                     | < 0.02          | 0.33            |
|     |                     |      |      |      |       |                     | Σ 100%          | Σ 100%          |
